# Supplementary material
Source: Springer Nature journal article supplement (https://www.springermedizin.de/resource/supplementary/13075_2005_1769_MOESM9_ESM.pdf/9690538)
Supplement: MOESM9 [file 9690538]

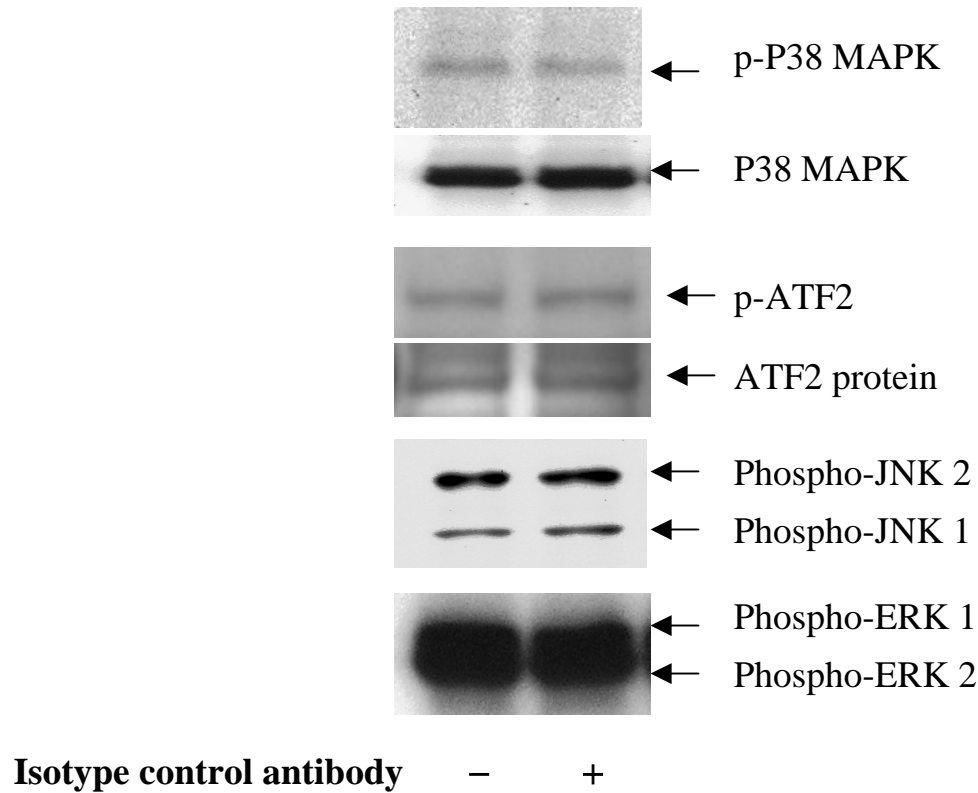

Supplement Figure 2. No significance difference was seen on the phosphorylation of p38, ATF2, JNK, and ERK between chondrocytes treated with or without an IgM isotype control antibody.
